# Supplementary material
Source: HighWire-hosted journal article supplement (https://jitc.bmj.com/content/13/4/e010580)
Supplement: inline-supplementary-material-2 [file inline-supplementary-material-2.xlsx]

## Sheet: Figure1
Fig.1B up			Fig.1B Down
PD-L1	Siglec15		PD-L1	Siglec15
2.46	50.05		0.16	40.6
0.11	7.15		0.37	38.1
0.46	45.72		0.57	40.44
0.11	34.34		0	20.15
1.51	59.28		0.04	12
13.68	73.33		5.01	2.93
2.67	30.67		0.1	3.48
0.13	23.41		0.63	4.15
0.27	34.13		0.12	3.41
0.03	15.87		0	4.55
3.25	30.45		0.01	5.23
0.43	22.03		0.01	2
	0		0.96	3.1
0.25	3.05		0.19	2.25
0.16	11.08		0.04	4.1
0.52	13.34		0	60.8
1.83	42.83		0.97	30.1
3.93	51.45		0.09	50.2
0	2.1		0.05	30
0.06	4.38		0	8.21
0	13.24		0.18	3.5
0.03	2.2		0.87	5.3
0.07	6.09		13.25	4.4
0.04	4.99		0.26	2.6
2.21	26.72		0.07	4.21
1.06	40.1		0.04	2.45
0.13	10.32		0	1.36
0.09	2.14		1.66	4
0.07	3.32		0.21	3.5
0.06	1.99		0	8.33
0.01	1.78		0.1	20.67
0.21	0.4		0	6.53
1.15	1		0.03	6.54
0.79	2		0.09	10.21
0.33	4.67		0	10
2.9	4.82		0.14	5.2
1.99	20.01		0.11	4.88
4.42	25.5		0.11	3.54
0.13	4.08		28.68	3.2
0.14	1.59		0.32	2
0	0.68		0.03	5.66
0.03	0.88		0.86	3.76
0	0.48		0.02	7.2
0.13	2.98		1.41	4.51
0.45	0.57		3.27	6.51
0.41	0.85		0.73	26.88
0.05	1.27		0.03	14.52
1.4	2.8		0.03	10.51
18.14	39.7		0.44	6.77
4.32	8.74		1.09	7.66
0.29	3.76		1.19	18.2
0.1	2.45		0.63	4.21
0.01	0.8		1.54	15.14
1.14	0.69		29.14	10.88
	0		0.19	6.72
0.17	0.56		0.29	13.45
0.04	0.78		0.12	8.56
0.11	0.25		0.01	13.67
0.21	0.3		18.07	5.87
0.11	3.21		5.28	10.17
14.74	15.1		21.94	20.76
2.04	7.3		0.17	15.67
2.58	4.38		0.25	16.92
0.9	2.15		1.43	20.76
0.02	0.3		0.23	14.65
1.42	0.34		1.01	9.67
	0		0.52	0.4
0.72	0.8		0.07	5.89
0.32	0.95		0.02	2.01
0.21	0.55		0.01	6.34
0.46	1.22		0.04	7.66
0.26	1.42		0.31	9.84
4.76	10.19		0.06	5.12
4.73	6.89		0.01	11.67
0.95	1.2		0.05	8.53
6.01	3.05		7.91	39.4
0.43	7.8		1.13	20.5
1.43	0.8		1.26	24.9
0.28	2.51		2.05	19.65
0.78	0.54		0.31	14.77
1.42	5.05		3.35	6.29
8.28	8.56		1.08	5.69
3.17	5.01		0.08	14.92
1.5	2.41		0.02	4.9
5.42	2.5		0	8.95
8.53	2.51		0.06	8.73
13.87	5.5		0.16	10.64
31.47	9.81		0.02	9.9
4.32	12.06		0	12.39
35.06	15.91		0.02	16.55
6.77	6		1.15	20.65
2.84	2.89		1.21	12.98
8.21	9.05		4.27	10.94
35.01	19.8		1.47	15.67
7.29	6.41		0.87	12.38
6.93	6.02		0.38	12.58
			0.02	2.98
			0.54	12.66
			0.12	12.88
			0.06	6.92
			1.52	14.75
			3.36	65.28
			0.32	12.3
			0.02	6.44
			0.68	39.66
			16.93	25.71
			0.07	4.91
			10.26	3.06
			0.1	4.98
			3.65	13.17
			0	4.99
			0.02	5.03
			0	50.96
			0.23	21.58
			0.3	9.85
			1.2	10.1
			0	18.43
			0.3	5.88
			0.02	4.02
			0.45	8.75
			0.02	7.21
			0.02	2.1
			0.01	1.4
			0.05	1.4
			0.03	1.4
			0.1	2.9
			0.02	2.8
			0.16	4.44
			0.49	2.81
			0.01	4.99
			31.61	3.53
			0.39	5.78
			0	2.4
			0.11	3.6
			0.09	12.6
			0.06	10.95
			1.83	4.99
			0.03	2.2
			0.04	1.3
			0.01	2.58
			0.04	4.88
			0.69	5.34
			0.4	6.78
			0.72	4.72
			0.11	5.06
			34.14	4.79
			0.04	6.61
			0.07	7.09
			0.34	12.75
			0.05	22.56
Fig.1D Lift				Fig.1D Right
BMDM	Blood	Spleen	Tumor	Monocyte	GM-CSF	M-CSF
0.782101	0.642571	1.22093	3.11725	1	2.52275	5.22344
0.690972	0.662649	1.21874	5.22909	1.21419	2.59368	3.79737
0.467177	0.55076	1.12204	4.00351	1.23971	2.89788	5.67649
0.890627	0.343463	0.573195	2.65596	one-way ANOVA		P Value
0.894675	0.156921	0.969283	3.53329	Monocyte vs. GM-CSF		0.0428
0.912125	0.667696	0.301333	3.77245	Monocyte vs. M-CSF		0.0005
one-way ANOVA		Adjusted P Value		GM-CSF vs. M-CSF		0.0081
BMDM vs. Blood		0.7875
BMDM vs. Spleen		0.97
BMDM vs. Tumor		<0.0001
Blood vs. Spleen		0.5272
Blood vs. Tumor		<0.0001
Spleen vs. Tumor		<0.0001
Fig.1F
Normal	LUAD	Unpaired t test
		P value
18.06	27.64	<0.0001
18.07	15.94
22.59	39.86
23.07	23.61
25.97	43.1
24.8	7.4
32.82	37.87
11.56	20.68
17.66	37
20.04	28.34
23.04	37.06
21.64	30.77
24.34	33.95
16.79	9.11
34.74	29.52
3.16	27.76
14.94	28.41
9.7	19.22
32.16	39.01
23.33	27.24
36.32	32.11
20.16	33.29
26.5	34.63
15.45	31.84
0	30.3
43.76	22.73
0	37.72
6.05	29.03
19.69	35.67
25.35	16.41
31.63	31.46
13.87	25.67
15.98	37.2
25.85	21.55
28.27	31.12
19.39	29.8
30.17	34.86
17.66	29.01
21.33	31.59
2.74	23.58
16.8	32.06
1.95	34.81
29.09	38.47
8.94	35.09
27.31	39.34
15.17	9.36
22.44	18.18
12.4	29.17
13.22	35.6
12.25	19.97
15.85	38.12
10.3	21.42
13.69	25.47
14.55	33.23
26.97	0
18.05	32.73
21.74	0
8.41	32.85
27.66	35.58
3.48	37.79
14	45.45
22.51	9.68
30.83	19.03
15.66	24.74
20.96	26.69
13.68	9.86
18.5	36.11
15.37	23.71
16.13	43.74
34.05	30.07
37.55	42
14.49	36.4
20.68	44.74
5.3	22.63
0	31.66
10.9	40.15
16.15	41.24
13.15	13.64
22.37	22.11
10.92	24.3
19.65	31.65
15.5	11.57
14.55	33.77
15.91	15.67
29.64	24.66
22.56	17.77
39.77	38.92
14.65	12.65
18.64	0
7.06	31.27
31.11	30.59
23.95	32.77
35.67	34.28
6.82	3.94
17.31	26.66

## Sheet: Figure2
Fig.2B up
nM	anti-S15xGM-CSF		anti-S15		Isotype ontrol
66.6667	1.19	1.054	1.154	1.176	0.028
13.3333	1.24	1.064	1.214	1.212	0.027
2.66667	1.165	1.027	1.061	1.115	0.037
0.533333	0.802	0.901	1.039	1.063	0.036
0.106667	0.453	0.428	0.574	0.522	0.035
0.021333	0.139	0.146	0.191	0.196	0.047
0.004267	0.064	0.067	0.074	0.078	0.031
0	0.037	0.055	0.044	0.038	0.038
Fig.2B Down
nM	anti-S15xGM-CSF		anti-S15		Isotype ontrol
66.6667	4675.96	4805.88	5029	5148	57.3
13.3333	4587.8	4713.08	5392	5499	44.7
2.66667	2859.4	2933.64	4014	4054	39.3
0.533333	1035.88	1047.48	1685	1696	38.1
0.106667	306.241	306.241	494	503	37.6
0.021333	95.5815	99.1774	152	146	38.2
0.004267	53.0185	56.2669	62.2	64	37.9
0	36.8	36.1	39.2	38.9	39
Fig.2C
nM	Anti-S15xmGM-CSF		Anti-S15		Isotype Control
66.6667	1905.58	1824.5	2225.2	2321.44	29.38	26.25
13.3333	1943.64	1907.78	2050.88	2228.72	27.46	23.96
2.66667	1516.02	1427.1	1619.58	1626.46	24.32	22.34
0.533333	923.86	939.72	1193.76	1303.36	23.7	21.42
0.106667	314.74	347.96	450.72	447.9	23.84	21.22
0.021333	132.42	133	215.64	219.26	20.88	21.16
0.004267	60.72	72	99.02	97.08	20.94	21.08
0	38.96	35.18	36	36.94	21.46	26.76
					21.46	21.26
Fig.2D
nM	Anti-Siglec15xGM-CSF		Anti-Siglec15		Isotype Control
66.6667	0.093	0.093	0.074	0.078	1.26
13.3333	0.091	0.09	0.074	0.073	1.267
2.66667	0.294	0.29	0.147	0.138	1.331
0.533333	1.102	1.102	0.898	0.807	1.316
0.106667	1.45	1.45	1.207	1.227	1.169
0.021333	1.484	1.484	1.329	1.245	1.301
0.004267	1.482	1.482	1.254	1.319	1.32
0	1.212	1.39	1.389	1.323	1.389
Fig.2F Left
nM	Anti-S15xmGM-CSF		mGM-CSF		Isotype control
1	1811122	1788552	1683478	1611260	671318	663678
0.2	1921604	1821099	1731106	1676523	656910	716676
0.04	1826845	1734658	1628280	1522475	664837	721071
0.008	1620743	1610820	1498704	1401941	704751	671629
0.0016	1283898	1246950	920536	995591	686449	658989
0.00032	895709	795883	669664	719988	600877	743827
6.4e-05	785381	606360	761035	702825	682683	667945
Fig.2F Right
nM	S15xGM-CSF		GM-CSF		Isotope Control
0.7	2264619	2101484	2145841	1951454	440327	402176
0.2333	2269338	2167965	2094510	2118924	419025	414456
0.0778	2216763	2204161	1862026	1599369	418370	408770
0.0259	2231058	2129340	1444443	1455118	414531	415650
0.0086	1875148	1883201	1159601	1160211	394182	412828
0.0029	1366938	1375554	783156	670009	427309	416039
0.001	1054671	1049501	571033	559919	409959	400271
0.0003	737015	714294	448931	465446	386760	395636
0.0001	542612	525246	432587	416174	391073	384703

## Sheet: Figure3
Fig.3A CD4 MFI
Isotype control	Siglec-15	Siglec-15+igG	Siglec-15+Anti-S15
1036	1369	1348	963
844	1242	1293	933
853	1310	1321	950
Siglec-15+GM-CSF	Siglec-15+Anti-S15xGM-CSF	Siglec-15+GM-CSF sialidase
1347	928	906
1312	903	885
1162	899	864
Tukey's multiple comparisons test			Adjusted P Value
Isotype control vs Siglec-15			<0.0001
Isotype control vs Siglec-15+igG			<0.0001
Isotype control vs Siglec-15+Anti-S15			0.9386
Isotype control vs Siglec-15+GM-CSF			<0.0001
Isotype control vs Siglec-15+Anti-S15xGM-CSF			>0.9999
Isotype control vs Siglec-15+GM-CSF sialidase			0.9886
Fig.3A CD8 MFI
Isotype control	Siglec-15	Siglec-15+igG	Siglec-15+Anti-S15
398	693	694	451
349	882	756	464
360	1036	963	407
Siglec-15+GM-CSF	Siglec-15+Anti-S15xGM-CSF	Siglec-15+GM-CSF sialidase
711	406	403
823	404	395
928	408	404
Tukey's multiple comparisons test			Adjusted P Value
Isotype control vs Siglec-15			0.0002
Isotype control vs Siglec-15+igG			0.0009
Isotype control vs Siglec-15+Anti-S15			0.9616
Isotype control vs Siglec-15+GM-CSF			0.0007
Isotype control vs Siglec-15+Anti-S15xGM-CSF			0.9988
Isotype control vs Siglec-15+GM-CSF sialidase			0.9995
Fig.3B left
AntiCD3-	AntiCD3+	Siglec15-Fc	Isotype Control
11.8	67.4	13.2	16.8
9.48	67.9	14.9	17.6
10.2	65.1	11.9	14.2
Anti-S15	GM-CSF	Anti-S15xGM-CSF
63.6	17.7	66.3
69.4	16.9	69.3
68.5	15.2	70.1
Tukey's multiple comparisons test			Adjusted P Value
AntiCD3+ vs Siglec15-Fc			<0.0001
AntiCD3+ vs Isotype Control			<0.0001
AntiCD3+ vs Anti-S15			>0.9999
AntiCD3+ vs GM-CSF			<0.0001
AntiCD3+ vs Anti-S15xGM-CSF			0.8986
Fig.3B Right
AntiCD3-	AntiCD3+	Siglec15-Fc	Isotype Control
2.85	83.5	14.5	24.3
5.66	87.3	21.6	18.6
4.33	80.9	16.2	18.9
Anti-S15	GM-CSF	Anti-S15xGM-CSF
87.7	22.3	84.2
87.7	21.8	86.4
85.3	19.3	80.5
Tukey's multiple comparisons test			Adjusted P Value
AntiCD3+ vs Siglec15-Fc			<0.0001
AntiCD3+ vs Isotype Control			<0.0001
AntiCD3+ vs Anti-S15			0.8043
AntiCD3+ vs GM-CSF			<0.0001
AntiCD3+ vs Anti-S15xGM-CSF			>0.9999

## Sheet: Figure4
Fig.4A Up
	Isotype Control
Low dose	2676	2867
Middle dose	2765	2799	2735	2764
High dose	2869	3176
	Anti-S15
Low dose	2566	2791
Middle dose	2933	2713	2805	2830
High dose	2935	3226
	GM-CSF-FC
Low dose	2914	2798
Middle dose	3037	2999	3423	3080
High dose	4327	3809
	Anti-S15xGM-CSF
Low dose	2902	2699
Middle dose	3844	4200	3984	3809
High dose	4258	4376
Two-way ANOVA
Low dose			Adjusted P Value
Isotype Control vs. Anti-S15			0.9405
Isotype Control vs. GM-CSF-FC			0.9543
Isotype Control vs. Anti-S15xGM-CSF			0.998
Anti-S15 vs. GM-CSF-FC			0.7032
Anti-S15 vs. Anti-S15xGM-CSF			0.8778
GM-CSF-FC vs. Anti-S15xGM-CSF			0.9862
Middle dose			Adjusted P Value
Isotype Control vs. Anti-S15			0.9647
Isotype Control vs. GM-CSF-FC			0.0221
Isotype Control vs. Anti-S15xGM-CSF			<0.0001
Anti-S15 vs. GM-CSF-FC			0.0592
Anti-S15 vs. Anti-S15xGM-CSF			<0.0001
GM-CSF-FC vs. Anti-S15xGM-CSF			<0.0001
High dose			Adjusted P Value
Isotype Control vs. Anti-S15			0.9843
Isotype Control vs. GM-CSF-FC			<0.0001
Isotype Control vs. Anti-S15xGM-CSF			<0.0001
Anti-S15 vs. GM-CSF-FC			<0.0001
Anti-S15 vs. Anti-S15xGM-CSF			<0.0001
GM-CSF-FC vs. Anti-S15xGM-CSF			0.4446
Fig.4B down
	Isotype Control
Low dose	2676	2867
Middle dose	2653	2580	2283	2626
High dose	3086	3421
	Anti-S15
	2566	2791
	3167	2893	2515	2640
	3684	3209
	GM-CSF-FC
	2914	2798
	2962	2553	2906	2693
	1864	1798
	Anti-S15xGM-CSF
	2902	2699
	1495	1379	1380	1367
	1629	1595
Two-way ANOVA
Low dose			Adjusted P Value
Isotype Control vs. Anti-S15			0.9587
Isotype Control vs. GM-CSF-FC			0.9685
Isotype Control vs. Anti-S15xGM-CSF			0.9986
Anti-S15 vs. GM-CSF-FC			0.779
Anti-S15 vs. Anti-S15xGM-CSF			0.9135
GM-CSF-FC vs. Anti-S15xGM-CSF			0.9906
Middle dose			Adjusted P Value
Isotype Control vs. Anti-S15			0.2109
Isotype Control vs. GM-CSF-FC			0.2857
Isotype Control vs. Anti-S15xGM-CSF			<0.0001
Anti-S15 vs. GM-CSF-FC			0.9974
Anti-S15 vs. Anti-S15xGM-CSF			<0.0001
GM-CSF-FC vs. Anti-S15xGM-CSF			<0.0001
High dose			Adjusted P Value
Isotype Control vs. Anti-S15			0.733
Isotype Control vs. GM-CSF-FC			<0.0001
Isotype Control vs. Anti-S15xGM-CSF			<0.0001
Anti-S15 vs. GM-CSF-FC			<0.0001
Anti-S15 vs. Anti-S15xGM-CSF			<0.0001
GM-CSF-FC vs. Anti-S15xGM-CSF			0.6513
	Isotype control vs. GM-CSF		0.0028
	Isotype control vs. Anti-S15xGM-CSF		0.0005
	GM-CSF vs. Anti-S15xGM-CSF		0.6288
Fig.4B Arg-1
Isotype control	GM-CSF	Anti-S15xGM-CSF
1.44176	0.938471	0.73907
1.41095	0.963707	0.735433
1.59475	0.884745	0.708742
2.50244	0.759611	0.526072
one-way ANOVA		Adjusted P Value
Isotype control vs. GM-CSF		0.0091
Isotype control vs. Anti-S15xGM-CSF		0.0023
GM-CSF vs. Anti-S15xGM-CSF		0.6184
Fig.4B IL-10
Isotype control	GM-CSF	Anti-S15xGM-CSF
1.64895	0.811053	0.747728
1.33176	1.34102	0.559936
3.18215	0.933033	0.336808
1.61523	0.908127	0.681741
3.44221	0.814131	0.356836
1.9078	0.57307	0.91466
one-way ANOVA		Adjusted P Value
Isotype control vs. GM-CSF		0.0028
Isotype control vs. Anti-S15xGM-CSF		0.0005
GM-CSF vs. Anti-S15xGM-CSF		0.6288
Fig.4B CD163
Isotype control	GM-CSF	Anti-S15xGM-CSF
1.89648	0.863189	0.610865
1.90528	0.926588	0.566442
1.90528	0.926588	0.566442
1.90528	0.926588	0.566442
one-way ANOVA		Adjusted P Value
Isotype control vs. GM-CSF		<0.0001
Isotype control vs. Anti-S15xGM-CSF		<0.0001
GM-CSF vs. Anti-S15xGM-CSF		<0.0001
Fig.4B IL-6
Isotype control	GM-CSF	Anti-S15xGM-CSF
0.359664	1.49082	1.865
0.227931	1.4012	3.13109
0.295248	1.55833	2.17347
0.774804	1.10259	1.17056
0.0307486	5.01645	6.48302
0.237587	2.48439	1.69417
one-way ANOVA		Adjusted P Value
Isotype control vs. GM-CSF		0.0905
Isotype control vs. Anti-S15xGM-CSF		0.0237
GM-CSF vs. Anti-S15xGM-CSF		0.7623
Fig.4C FITC-detran
Isotype Control	Anti-S15	mGM-CSF	Anti-S15xGM-CSF
51307	50450	79656	123061
57703	55304	79192	172131
79634	67157	89219	179181
one-way ANOVA			Adjusted P Value
Isotype Control vs. Anti-S15			0.9827
Isotype Control vs. mGM-CSF			0.5512
Isotype Control vs. Anti-S15xGM-CSF			0.0008
Anti-S15 vs. mGM-CSF			0.3705
Anti-S15 vs. Anti-S15xGM-CSF			0.0006
mGM-CSF vs. Anti-S15xGM-CSF			0.0036
Fig.4C DQ-OVA
Isotype Control	Anti-S15	mGM-CSF	Anti-S15xGM-CSF
109296	96750	130850	220889
113316	89539	136279	229837
120626	85872	137297	214446
one-way ANOVA			Adjusted P Value
Isotype Control vs. Anti-S15			0.0047
Isotype Control vs. mGM-CSF			0.0113
Isotype Control vs. Anti-S15xGM-CSF			<0.0001
Anti-S15 vs. mGM-CSF			<0.0001
Anti-S15 vs. Anti-S15xGM-CSF			<0.0001
mGM-CSF vs. Anti-S15xGM-CSF			<0.0001
Fig.4C OVA(257-264)
Isotype Control	Anti-S15	mGM-CSF	Anti-S15xGM-CSF
29230	27747	56803	100429
32986	50139	66230	93788
29338	34144	76041	97094
one-way ANOVA			Adjusted P Value
Isotype Control vs. Anti-S15			0.7124
Isotype Control vs. mGM-CSF			0.0021
Isotype Control vs. Anti-S15xGM-CSF			<0.0001
Anti-S15 vs. mGM-CSF			0.0078
Anti-S15 vs. Anti-S15xGM-CSF			<0.0001
mGM-CSF vs. Anti-S15xGM-CSF			0.0056
Fig.4C MHCI (H-2Kb)
Isotype Control	Anti-S15	mGM-CSF	Anti-S15xGM-CSF
1067	1081	1078	1977
1137	989	1131	2069
1215	1137	1145	1778
one-way ANOVA			Adjusted P Value
Isotype Control vs. Anti-S15			0.7889
Isotype Control vs. mGM-CSF			0.9912
Isotype Control vs. Anti-S15xGM-CSF			<0.0001
Anti-S15 vs. mGM-CSF			0.9138
Anti-S15 vs. Anti-S15xGM-CSF			<0.0001
mGM-CSF vs. Anti-S15xGM-CSF			<0.0001
Fig.4C MHCII
Isotype Control	Anti-S15	mGM-CSF	Anti-S15xGM-CSF
2529	4129	6555	18933
5038	4576	6367	21532
4352	4717	6101	24516
one-way ANOVA			Adjusted P Value
Isotype Control vs. Anti-S15			0.9776
Isotype Control vs. mGM-CSF			0.312
Isotype Control vs. Anti-S15xGM-CSF			<0.0001
Anti-S15 vs. mGM-CSF			0.4938
Anti-S15 vs. Anti-S15xGM-CSF			<0.0001
mGM-CSF vs. Anti-S15xGM-CSF			<0.0001
Fig.4D FTIC-Dextran
Isotype Control	Anti-S15	GM-CSF	Anti-S15xGM-CSF
42703	54029	262269	363595
62683	37407	200348	280570
23347	30852	167108	327676
53640	27016	130532	335948
one-way ANOVA			Adjusted P Value
Isotype Control vs. Anti-S15			0.9859
Isotype Control vs. GM-CSF			0.0003
Isotype Control vs. Anti-S15xGM-CSF			<0.0001
Anti-S15 vs. GM-CSF			0.0002
Anti-S15 vs. Anti-S15xGM-CSF			<0.0001
GM-CSF vs. Anti-S15xGM-CSF			0.0006
Fig.4D DQ-OVA
Isotype Control	Anti-S15	GM-CSF	Anti-S15xGM-CSF
606000	564000	1460000	1610000
594000	631000	1470000	1820000
638000	671000	1330000	1650000
one-way ANOVA			Adjusted P Value
Isotype Control vs. Anti-S15			0.9986
Isotype Control vs. GM-CSF			<0.0001
Isotype Control vs. Anti-S15xGM-CSF			<0.0001
Anti-S15 vs. GM-CSF			<0.0001
Anti-S15 vs. Anti-S15xGM-CSF			<0.0001
GM-CSF vs. Anti-S15xGM-CSF			0.0085
Fig.4D HLA-A2
Isotype Control	Anti-S15	GM-CSF	Anti-S15xGM-CSF
8342	7708	10660	11079
8136	8223	10646	11689
8155	8234	10205	11993
one-way ANOVA			Adjusted P Value
Isotype Control vs. Anti-S15			0.9247
Isotype Control vs. GM-CSF			<0.0001
Isotype Control vs. Anti-S15xGM-CSF			<0.0001
Anti-S15 vs. GM-CSF			<0.0001
Anti-S15 vs. Anti-S15xGM-CSF			<0.0001
GM-CSF vs. Anti-S15xGM-CSF			0.0117
Fig.4D HLA-DR
Isotype Control	Anti-S15	GM-CSF	Anti-S15xGM-CSF
1321	1315	1969	3093
1309	1425	1961	3260
1285	1461	2084	3131
one-way ANOVA			Adjusted P Value
Isotype Control vs. Anti-S15			0.3759
Isotype Control vs. GM-CSF			<0.0001
Isotype Control vs. Anti-S15xGM-CSF			<0.0001
Anti-S15 vs. GM-CSF			<0.0001
Anti-S15 vs. Anti-S15xGM-CSF			<0.0001
GM-CSF vs. Anti-S15xGM-CSF			<0.0001

## Sheet: Figure5
Fig.5A
h	GM-CSF			Anti-S15xGM-CSF
0	1413.56	1472.05	1431.58	1427.48	1328.86	1395.57
6	399.703	388.214	411.206	1163.39	1183.33	1098.53
12	120.622	131.17	116.964	933.377	953.314	926.016
24	9.0945	9.87827	8.16738	472.311	500.998	470.509
48	0.643793	0.652919	0.737798	171.579	176.05	177.006
72	0.503272	0.710178	0.461519	107.349	118.125	112.626
120	0.46806	0.498911	0.672786	52.7841	52.7342	52.7093
168	0.501805	0.533473	1.78289	1.44911	2.24267	5.35365
Fig.5B Left
Liver	Spleen	kidney	lung	Tumor	one-way ANOVA		P Value
0.144522	0.161408	0.0888502	0.106994	0.381797	Liver vs. Spleen		0.9519
0.119773	0.142462	0.175903	0.153457	0.470622	Liver vs. kidney		0.884
0.216135	0.231789	0.156461	0.116949	0.531633	Liver vs. lung		0.7547
0.16439	0.258457	0.0674139	0.112813	0.264381	Liver vs. Tumor		<0.0001
0.109465	0.105816	0.0758487	0.019008	0.381199	Spleen vs. kidney		0.494
					Spleen vs. lung		0.3474
					Spleen vs. Tumor		0.0002
					kidney vs. lung		0.9987
					kidney vs. Tumor		<0.0001
					lung vs. Tumor		<0.0001
Fig.5B Right
Liver	Spleen	kidney	lung	Tumor	one-way ANOVA		P Value
0.0627481	0.168313	0	0	0.0163956	Liver vs. Spleen		0.0928
0.00010265	0.0429689	0	0	0.00737186	Liver vs. kidney		0.1259
0.0627481	0.0832262	0	0	0.0133112	Liver vs. lung		0.1259
0.102885	0.111936	0	0	0.00950475	Liver vs. Tumor		0.3502
0.00292643	0.0712725	0	0	0.0104892	Spleen vs. kidney		0.0004
					Spleen vs. lung		0.0004
					Spleen vs. Tumor		0.0015
					kidney vs. lung		>0.9999
					kidney vs. Tumor		0.9699
					lung vs. Tumor		0.9699
Fig.5D
Days	PBS
0	75.464	77.3475	81.1759	83.1474	89.7031	90.6048	91.9897
2	123.7	135	129.491	162.792	111.893	147.425	98.4704
4	134.92	131.27	137.06	181.608	157.22	204.19	178.67
6	149.82	192.12	203.55	389.91	218.49	278.25	229.31
8	215.12	314.92	272.4	392.851	299.38	414.95	280.7
10	372.63	435.54	382.11	532.78	334.92	756.35	369.19
0	95.092	97.4521	103.209	105.353	107.153	111.468
2	117.754	131.424	135.63	177.466	179.956	181.464
4	161.89	157.073	141.26	185.532	291.114	303.732
6	254.08	258.406	275.49	196.703	399.962	361.491
8	393.3	372.74	647.06	218.165	593.177	573.495
10	632.69	399.173	863.495	365.119	814.733	728.535
Days	Anti-S15,10mg/kg
0	74.58	79.821	82.8285	84.3835	88.2848	90.1777	90.9327
2	97.6	89.7	59.5	111.06	96.53	95.27	193.081
4	121.81	110.02	95.67	121.22	142.99	156.29	262.161
6	167.86	150.84	99.06	111.52	189.75	160.3	359.782
8	230.92	190.09	137.62	128.49	193.98	213.67	451.279
10	301.26	223.17	88.29	89.92	111.47	170	607.81
0	93.2137	99.7911	102.999	103.562	105.505	114.236
2	108.84	152.78	104.294	113.561	105.95	101.876
4	160.01	188.848	220.875	135.818	171.988	139.456
6	288.44	167.053	230.897	166.409	280.338	171.507
8	400.39	192.307	342.618	221.23	386.861	170.83
10	582.72	255.1	378.312	306.721	589.368	171.584
Days	Anti-S15×mGM-CSF,10mg/kg
0	76.5994	77.4864	82.8828	83.2764	84.5848	89.9123	91.6252
2	85.89	101.65	94.5516	140.29	129.77	132.34	104.55
4	89.02	131.27	119.01	148.48	139.84	161.88	126.62
6	97.11	139.76	143.36	127.12	201.26	181.22	139.33
8	82.37	134.5	161.47	125.54	264.8	176.95	133.41
10	50.11	139.54	162.75	119.89	226.79	113.53	107.92
0	96.7711	98.9739	101.823	103.377	109.89	112.462
2	152.78	143.152	111.258	143.585	125.76	97.6539
4	188.85	199.03	130.957	148.931	163.476	118.65
6	167.05	231.101	159.521	278.487	143.121	101.37
8	192.31	294.261	106.817	346.339	125.318	53.6145
10	175.1	296.431	42.8283	506.678	47.1589	27.2421
Days	Anti-S15×mGM-CSF,10mg/kg
0	95.3734	123.974	114.236	79.5357	79.821	95.7295
2	138.681	91.0728	146.336	126.44	148.75	166.02
4	177.014	124.585	187.734	153.19	204.63	229.81
6	304.25	118.858	243.257	220.74	315.13	264.42
8	497.877	203.035	442.566	395.49	599.63	445.13
0	106.947	99.5338
2	179.8	188.44
4	285.39	263.33
6	399.23	444.48
8	566.42	651.11
Two-way ANOVA			Individual P Value
PBS vs Anti-S15			<0.0001
PBS vs Anti-S15(A2A5)×mGM-CSF			<0.0001
PBS vs mGM-CSF			0.9989
Anti-S15 vs Anti-S15(A2A5)×mGM-CSF			0.0533
Anti-S15 vs mGM-CSF			0.0003
Anti-S15(A2A5)×mGM-CSF vs mGM-CSF			<0.0001
Fig.5F
PBS	Anti-S15	Anti-S15×mGM-CSF
0.855	0.325	0.11
0.622	0.155	0.12
0.617	0.35	0.11
0.321	0.6	0.056
0.84	0.19	0.045
one-way ANOVA		Adjusted P Value
PBS vs. Anti-S15		0.0199
PBS vs. Anti-S15×mGM-CSF		0.0004
Anti-S15 vs. Anti-S15×mGM-CSF		0.095
Fig.5G
Days	PBS
0	18.1	17.5	18.2	17.3	18.5	19	16.4
2	17.8	17.4	17.1	17.2	18.3	18	16.8
4	18.7	18.6	18.8	17.8	18.6	19.4	17
6	18.2	18.3	17.9	17.4	18.8	19.2	16.5
8	18.1	18.4	17.9	17.4	18.8	19.5	16.4
10	18	18.8	18.5	18.3	18.8	20.2	16.8
0	17.8	17.4	17.6	19.3	17.5	17.6
2	17.4	16.7	18.2	18.8	16.8	17.4
4	17.9	17.6	18.1	19	17.4	18.6
6	18.3	17.3	18.3	19	16.8	18.7
8	18.6	17.8	18.1	19.8	17.2	18.8
10	18.9	17.5	19.3	18.9	17.4	20.2
Days	Anti-S15,10mg/kg
0	18.4	19.1	17.8	18.2	17	17.8	17.6
2	18	19.1	17.9	17.8	16.7	16.8	16.8
4	19.4	19.5	18.6	18.2	18.9	18.4	17.9
6	18.7	19.7	18.5	18.6	17.9	17.7	17.7
8	18	18.8	18.5	18.5	16.7	18.5	16.2
10	20	19.3	18.6	19.3	17.4	18.6	17.5
0	17.4	18.9	17.9	18.9	18.2	17
2	16.7	17.8	17.8	17.9	18.7	16.7
4	18.9	18.4	18.6	18.3	18.5	18
6	17.8	17.8	18.5	19.2	18.4	17.7
8	17.4	18.5	18.4	19	18	16.5
10	17.9	18.6	18.4	20.2	18.1	17.8
Days	Anti-S15×mGM-CSF,10mg/kg
0	18.2	18.4	18.3	16.5	17.6	18.3	18.4
2	18.3	18.3	17.7	16.3	17.7	17.8	18
4	17.6	18.1	17.6	16.8	17.5	17	18.1
6	17.8	18.8	18	17.8	17.8	17.7	18.7
8	18.5	19.5	18.6	17.4	18.5	18.6	19.5
10	18.7	17.8	18.4	17.5	18.7	19.1	18.6
0	17	17.7	18.4	18	17.9	17.8
2	17.7	17.7	17.9	17.9	17.8	17.2
4	17.6	17.6	18.1	18.1	17.6	17.6
6	17.7	17.7	18	18.8	17.5	18.6
8	18.1	18.1	19	19.5	17.8	19
10	17.3	18.6	19.2	18.7	18.7	18.7
Days	Anti-S15×mGM-CSF,10mg/kg
0	18.3	17.8	18.3	17.9	17	18.1
2	17.8	18.9	16.7	16.8	17.8	17.8
4	16.8	17.8	16	16.6	17.6	17.4
6	15.9	16.5	16.8	16.8	17	17
8	15.2	16	18	16.7	16.5	17
0	19.1	17.7
2	17.8	17.8
4	17.4	17.3
6	17	16.9
8	16.3	16.3
Fig.5H
	Days Post Treatment	PBS	Anti-S15	Anti-S15(A2A5)×mGM-CSF
	24	1
	24	1
	28	1
	28	1
	28	1
	31	1
	31	1
	35	1
	24		1
	24		1
	31		1
	35		1
	38		0
	38		0
	38		0
	38		0
	28			1
	31			0
	38			0
	38			0
	38			0
	38			0
	38			0

## Sheet: Figure6
Fig.6B Left
PBS	Anti-S15	Anti-S15xmGM-CSF
23.825	31.025	45.275
30.2	35.225	33.35
25.075	35.575	29.675
32.475	31.05	49.225
28.1	29.3	36.75
one-way ANOVA		Adjusted P Value
PBS vs. Anti-S15		0.4127
PBS vs. Anti-S15xmGM-CSF		0.0195
Anti-S15 vs. Anti-S15xmGM-CSF		0.1868
Fig.6B Middle
PBS	Anti-S15	Anti-S15xmGM-CSF
12.45	16.5	35.6
25.05	11.65	26.65
17	17.7	30.2
16.2	25.05	38.95
10.805	19.15	35.45
one-way ANOVA		Adjusted P Value
PBS vs. Anti-S15		0.8581
PBS vs. Anti-S15xmGM-CSF		0.0005
Anti-S15 vs. Anti-S15xmGM-CSF		0.0012
Fig.6B Right
PBS	Anti-S15	Anti-S15xmGM-CSF
0.20148	0.620999	7.1383
0.625263	0.428736	2.35468
0.671703	0.644755	3.4247
0.613665	0.746495	4.35664
0.205179	0.554802	3.48396
one-way ANOVA		Adjusted P Value
PBS vs. Anti-S15		0.9777
PBS vs. Anti-S15xmGM-CSF		0.0004
Anti-S15 vs. Anti-S15xmGM-CSF		0.0005
Fig.6C Left
PBS	Anti-S15	Anti-S15xmGM-CSF
24.05	35.1	36.1
29.75	28.2	33.5
28.9	31.7	34.4
31.05	32	32
21.15	33.3	35.5
one-way ANOVA		Adjusted P Value
PBS vs. Anti-S15		0.048
PBS vs. Anti-S15xmGM-CSF		0.0058
Anti-S15 vs. Anti-S15xmGM-CSF		0.483
Fig.6C Middle
PBS	Anti-S15	Anti-S15xmGM-CSF
56.4	58.2	51.2
35.1	52.3	50.7
54.35	55.7	58.6
56.1	59.7	50.3
49.75	59.7	52.6
one-way ANOVA		Adjusted P Value
PBS vs. Anti-S15		ns
PBS vs. Anti-S15xmGM-CSF		ns
Anti-S15 vs. Anti-S15xmGM-CSF		ns
Fig.6C Right
PBS	Anti-S15	Anti-S15xmGM-CSF
19.9	18.8	29
22.85	22.2	31.8
21.35	19.8	23.7
21.1	18.7	34
23.6	17.8	30.6
one-way ANOVA		Adjusted P Value
PBS vs. Anti-S15		0.3682
PBS vs. Anti-S15xmGM-CSF		0.0009
Anti-S15 vs. Anti-S15xmGM-CSF		0.0001
Fig.6D
	PBS	Anti-S15	Anti-S15xmGM-CSF
DC	16.301	18.01	33.37
M1 Macrophage	8.46138	11.045	29.5093
M2 Macrophage	19.3181	18.5226	7.80921
CD4	6.98382	9.95596	10.6045
CD8	3.81374	4.75776	7.82192
Other CD45 Cells	45.122	37.7087	10.8851
Fig.6E	IL-10
PBS	Anti-S15	Anti-S15xmGM-CSF
34.4216	20.7484	12.3377
38.2899	14.6435	18.4737
40.8688	27.0115	14.6668
37.5531	24.8661	15.2236
27.2375	14.0528	21.7337
one-way ANOVA		Adjusted P Value
PBS vs. Anti-S15		0.001
PBS vs. Anti-S15xmGM-CSF		0.0002
Anti-S15 vs. Anti-S15xmGM-CSF		0.4794
Fig.6E	TGF-β1
PBS	Anti-S15	Anti-S15xmGM-CSF
6350.95	3556.08	2037.72
4065.93	2289.47	2068.42
4250.13	4064	3806.11
4631.69	3245.63	2185.09
4447.48	3425.41	3419.28
one-way ANOVA		Adjusted P Value
PBS vs. Anti-S15		0.0403
PBS vs. Anti-S15xmGM-CSF		0.0048
Anti-S15 vs. Anti-S15xmGM-CSF		0.4794
Fig.6E	IL-6
PBS	Anti-S15	Anti-S15xmGM-CSF
111.995	157.779	160.049
76.7541	131.3	189.482
102.465	183.575	108.408
107.554	104.308	194.85
73.8992	174.79	205.295
one-way ANOVA		Adjusted P Value
PBS vs. Anti-S15		0.0373
PBS vs. Anti-S15xmGM-CSF		0.0054
Anti-S15 vs. Anti-S15xmGM-CSF		0.5439
Fig.6E	TNF-α
PBS	Anti-S15	Anti-S15xmGM-CSF
60.0549	64.8658	119.887
74.3983	86.5969	102.013
60.232	99.4699	110.92
35.9722	84.4621	147.001
29.5973	72.7947	189.195
one-way ANOVA		Adjusted P Value
PBS vs. Anti-S15		0.1736
PBS vs. Anti-S15xmGM-CSF		0.0005
Anti-S15 vs. Anti-S15xmGM-CSF		0.0136

## Sheet: Figure S1
Fig.S1A
MC38+Anti-S15	MC38-mS15+Isotype control	MC38-mS15+Anti-S15
2763	3454	401000
3188	3389	342255
2588	2381	369945
one-way ANOVA
		Adjusted P Value
MC38+Anti-S15 vs MC38-mS15+Isotype control		0.9999
MC38+Anti-S15 vs MC38-mS15+Anti-S15		<0.0001
MC38-mS15+Isotype control vs MC38-mS15+Anti-S15		<0.0001
Fig.S1B
Isotype control	Anti-S15	Anti-S15×mGM-CSF
1449	1290	114984
1241	1171	112661
1291	1113	92318
one-way ANOVA
		Adjusted P Value
293T+Anti-S15 vs 293T-hS15+Isotype control		0.9997
293T+Anti-S15 vs 293T-hS15+Anti-S15		0.0001
293T-hS15+Isotype control vs 293T-hS15+Anti-S15		0.0001

## Sheet: Figure S2
Fig.S2A
Isotype control	Anti-S15	Anti-S15×mGM-CSF
1837	2625	4259
1828	2929	4192
1634	2789	4859
one-way ANOVA
		Adjusted P Value
Isotype control vs Anti-S15		0.0048
Isotype control vs Anti-S15×mGM-CSF		<0.0001
Fig.S2B
Isotype control	Anti-S15	Anti-S15×mGM-CSF
30666	48098	61080
37363	55791	77601
30034	46341	65342
one-way ANOVA
		Adjusted P Value
Isotype control vs Anti-S15		0.0321
Isotype control vs Anti-S15×mGM-CSF		0.0011

## Sheet: Figure S3
Fig.S3A
days	SIglec15
0	305	350.5	346.2	350.5	347
3	1388.67	1149.33	885.6	2232	667.333
6	1190	2831.33	3444.8	2149	2007.67
9	780.333	1833.67	2098.4	806.333	934.333
days	PD-1
0	415	285.5	252	387.5	252.5
3	2071.33	1234.33	785.667	2073.67	577
6	1791	3056.67	2242	1425	1133.67
9	800	2203.33	1979	766.667	813
days	TIGIT
0	155.667	328	274.667	260	192.667
3	999	1465.67	1218	1965	747.667
6	1056.33	3932	2450.67	2187.67	2243.33
9	1191.67	2318.67	2269.67	2454	2250.67
days	NC
0	349	286
3	272	323
6	342	303
9	394	302
two-way ANOVA
SIglec15		Adjusted P Value
Row 1 vs. Row 2		0.046
Row 1 vs. Row 3		<0.0001
Row 1 vs. Row 4		0.039
two-way ANOVA
PD-1		Adjusted P Value
Row 1 vs. Row 2		0.0231
Row 1 vs. Row 3		0.0002
Row 1 vs. Row 4		0.0294
two-way ANOVA
TIGIT		Adjusted P Value
Row 1 vs. Row 2		0.022
Row 1 vs. Row 3		<0.0001
Row 1 vs. Row 4		<0.0001
Fig.S3B Left
Ab(ug/ml)	Siglec15		isotype control
10	10.4	14.3	84.3	76.1
5	36	39.4	82	75
2.5	54.2	52.9	77.3	73
1.25	64.1	55.8	90.9	76.7
0.625	68.2	64.5	77.5	76.1
0.3125	69.6	66.2	79.4	77.2
0.15625	73.1	68.6	78	75.3
0	78.5	78.2
Fig.S3B Right
Ab(ug/ml)	Siglec15		Isotype Control
10	13.8	23.3	83.9	76.4
5	47.9	51.3	80.8	77.9
2.5	66.4	64.1	77.2	76
1.25	66.6	63.5	92.9	76.7
0.625	69.4	61.4	77.6	76.4
0.3125	71.3	69.2	80.4	79.6
0.15625	74.3	71.3	79.3	76
0	80.7	75.6

## Sheet: Figfure S5
Fig.S5B
Days	PBS
0	61.13	72.55	72.71	74.03	80.96
2	120.88	116.26	112.95	169.02	153.25
4	190.07	260.39	256.34	370.21	378.09
6	333.37	385.75	413.45	722.94	610.62
8	518.1	573.78	694.95	1312.24	814.02
10	830.99	910.81	1013.78	1869.17	1456.64
0	84.19	85.01	86.78	94.32	108.51
2	210.3	178.69	170.22	250.97	204.22
4	444.32	345.57	294.62	585.31	442.78
6	554.15	538.53	422.73	849.98	591.58
8	668.1	824.42	749.89	1302.7	977.77
10	1040.97	1428.84	1389.51	1730.69	1480.56
Days	Anti-S15,10mg/kg
0	65.41	65.64	82.8345	78	78.28
2	137.73	125.89	170.87	165.17	177.39
4	178.12	278.03	307.75	336.44	477.25
6	352.96	303.07	413.79	539.93	829.75
8	565.49	493.41	608.38	678.1	1193.42
10	998.75	817.62	1016.46	1027.32	1737.6
0	83.48	85.36	86.56	100.09	103.67
2	138.98	139.3	179.13	170.77	235.38
4	342.67	265.29	248.69	312.73	611.75
6	654.36	562.11	392.02	459.56	695.92
8	808.59	769.84	713.11	634.82	1049.52
10	1338.13	1148.28	1245.03	925.15	1734.56
Days	Anti-S15×mGM-CSF,10mg/kg
0	65.2438	66.5382	74.1652	76.0161	80.1504
2	98.97	107.9	148.28	133.05	134.64
4	199.48	192.82	263.6	253.48	150.33
6	286.35	308.45	311.52	419.71	285.96
8	379.81	407.15	403.83	613.06	354.72
10	552.1	679.3	521.51	996.17	540.4
0	74.98	84.3309	87.12	101.331	102.689
2	145.01	154.1	127.52	166.926	225.071
4	281.8	168.38	280.24	245.264	373.991
6	389.97	270.2	238.21	271.463	546.173
8	349.58	361.14	167.26	468.568	889.932
10	448.77	593.29	161.57	576.175	1452.15
Two-way ANOVA			Individual P Value
PBS vs Anti-S15			0.4169
PBS vs Anti-S15(A2A5)×mGM-CSF			<0.0001
Anti-S15 vs Anti-S15(A2A5)×mGM-CSF			<0.0001
Fig.S5C
PBS	Anti-S15	Anti-S15×mGM-CSF
1.985	2.152	1.892
1.952	1.856	1.572
1.874	1.742	1.152
1.811	1.732	0.712
1.621	1.524	0.557
one-way ANOVA		Adjusted P Value
PBS vs. Anti-S15		0.9766
PBS vs. Anti-S15×mGM-CSF		0.0307
Anti-S15 vs. Anti-S15×mGM-CSF		0.0444
Fig.S5D
Days	PBS
0	18.7	17.7	16.9	18.7	17.9
2	17.8	17.8	16.2	17.9	16.9
4	17.5	17.9	16.6	18.3	17.2
6	17.8	17	17	18.8	17.2
8	17.9	18.4	17.3	19.7	17.8
10	17.5	18.4	17.8	20.3	17.7
0	19.3	18.2	20.3	16.9	18.1
2	18.7	17.7	19.5	16.5	18.5
4	19.1	18.2	19.6	17.8	18.6
6	18.8	18.2	20.5	17.9	18.6
8	18.8	18.7	20.8	17.9	19.5
10	20.3	19.6	20	19.5	19.8
Days	Anti-S15,10mg/kg
0	16.8	18.6	18.3	16.9	18.7
2	16	18.1	17.3	17.3	18.5
4	18.2	18.8	17.9	17.9	18.7
6	17.3	19.4	18.3	18.3	19.4
8	17.7	19.4	17.9	18.3	20.3
10	17.9	20	18.1	18.5	21.3
0	19.2	19.3	18.3	17.6	17.7
2	19	19	17.3	17.2	17.3
4	19	18.7	17.9	17.8	17.9
6	19.4	19.6	19.2	18.1	18.4
8	20.9	20.2	19.1	18.4	18.4
10	20.9	20.8	19.7	19.1	19.5
Days	Anti-S15×mGM-CSF,10mg/kg
0	17.5	17.8	18.8	17.2	17.9
2	18.1	16.9	18.6	17.2	17.2
4	18.6	17.8	18.8	15.9	16.5
6	20	18.2	18.5	16.3	17.5
8	20	18.8	18.5	17.3	17.5
10	20	18.9	18.8	17.9	17.9
0	19.5	16.9	18.8	16.9	17.3
2	18.7	16.5	18.7	16.7	17.2
4	17.7	16.4	17.7	16.7	17.7
6	17.6	17.5	17.3	16.4	18.1
8	18.9	18.3	17.3	17.3	18.1
10	19.7	17.9	17.5	17.8	18
Fig.S5E
days	PBS	Anti-S15	Anti-S15(A2A5)×mGM-CSF
12	1
12	1
12	1
12	1
12	1
14	1
14	1
14	1
16	1
16	1
12		1
12		1
12		1
14		1
14		1
14		1
16		1
16		1
16		1
18		1
12			1
18			1
20			1
22			1
22			1
22			1
22			1
30			1
32			0
